# Supplementary material
Source: ML conference proceedings conference paper supplement (https://proceedings.neurips.cc/paper_files/paper/2020/hash/ba95d78a7c942571185308775a97a3a0-Abstract.html)
Supplement: Supplementary file [file ba95d78a7c942571185308775a97a3a0-Supplemental.pdf]

# 1 Overview

2 This document is supplementary material for the paper “Random Walk Graph Neural Networks”. It is  
 3 organized as follows. In Section 2, we define some basic concepts from linear algebra. In Section 3,  
 4 we prove the Proposition 1. Section 4 provides a detailed description of the graph classification  
 5 datasets. Finally, in Section 5, we give more examples of “hidden graphs” extracted from the models  
 6 trained on the synthetic datasets.

## 7 2 Linear Algebra Concepts

8 In this Section, we provide definitions for concepts of linear algebra, namely the vectorization  
 9 operator, the inverse vectorization operator and the Kronecker product, which we use heavily in the  
 10 main paper.

11 **Definition 1.** Given a real matrix  $\mathbf{A} \in \mathbb{R}^{m \times n}$ , the vectorization operator  $\text{vec} : \mathbb{R}^{m \times n} \rightarrow \mathbb{R}^{mn}$  is  
 12 defined as:

$$\text{vec}(\mathbf{A}) = \begin{bmatrix} \mathbf{A}_{:1} \\ \mathbf{A}_{:2} \\ \vdots \\ \mathbf{A}_{:n} \end{bmatrix}$$

13 where  $\mathbf{A}_{:i}$  is the  $i^{\text{th}}$  column of  $\mathbf{A}$ .

14 **Definition 2.** Given a real vector  $\mathbf{b} \in \mathbb{R}^{mn}$ , the inverse vectorization operator  $\text{vec}^{-1} : \mathbb{R}^{mn} \rightarrow$   
 15  $\mathbb{R}^{n \times m}$  is defined as:

$$\text{vec}^{-1}(\mathbf{b}) = \begin{bmatrix} \mathbf{b}_1 & \mathbf{b}_{n+1} & \cdots & \mathbf{b}_{n(m-1)+1} \\ \mathbf{b}_2 & \mathbf{b}_{n+2} & \cdots & \mathbf{b}_{n(m-1)+2} \\ \vdots & \vdots & \vdots & \vdots \\ \mathbf{b}_n & \mathbf{b}_{2n} & \cdots & \mathbf{b}_{nm} \end{bmatrix}$$

16 **Definition 3.** Given real matrices  $\mathbf{A} \in \mathbb{R}^{n \times m}$  and  $\mathbf{B} \in \mathbb{R}^{p \times q}$ , the Kronecker product  $\mathbf{A} \otimes \mathbf{B} \in$   
 17  $\mathbb{R}^{np \times mq}$  defined as:

$$\mathbf{A} \otimes \mathbf{B} = \begin{bmatrix} \mathbf{A}_{11} \mathbf{B} & \mathbf{A}_{12} \mathbf{B} & \cdots & \mathbf{A}_{1m} \mathbf{B} \\ \mathbf{A}_{21} \mathbf{B} & \mathbf{A}_{22} \mathbf{B} & \cdots & \mathbf{A}_{2m} \mathbf{B} \\ \vdots & \vdots & \vdots & \vdots \\ \mathbf{A}_{n1} \mathbf{B} & \mathbf{A}_{n2} \mathbf{B} & \cdots & \mathbf{A}_{nm} \mathbf{B} \end{bmatrix}$$

## 18 3 Proof of Proposition 1

19 For convenience, we restate the Proposition below.

20 **Proposition 1.** Let  $\mathbf{A}_1 \in \mathbb{R}^{n \times n}$  and  $\mathbf{A}_2 \in \mathbb{R}^{m \times m}$  be two real matrices such that:

$$\mathbf{A}_\times = \mathbf{A}_1 \otimes \mathbf{A}_2$$

21 Then, for any  $p \in \mathbb{N}$ , we have that:

$$\mathbf{A}_\times^p = (\mathbf{A}_1 \otimes \mathbf{A}_2)^p = \mathbf{A}_1^p \otimes \mathbf{A}_2^p$$

22 *Proof.* For  $p \geq 1$ , we prove the proposition by induction on  $p$ . It is obviously true for  $p = 1$ . Now  
 23 take as an inductive hypothesis that it is true for some  $p \geq 1$ . It is well-known that the following  
 24 property holds [1](Proposition 7.1.6):

$$(\mathbf{A} \otimes \mathbf{B})(\mathbf{C} \otimes \mathbf{D}) = (\mathbf{A} \mathbf{C} \otimes \mathbf{B} \mathbf{D})$$

25 Based on the above property, we use the induction hypothesis to obtain:

$$\mathbf{A}_\times^{p+1} = \mathbf{A}_\times^p \mathbf{A}_\times = (\mathbf{A}_1^p \otimes \mathbf{A}_2^p)(\mathbf{A}_1 \otimes \mathbf{A}_2) = (\mathbf{A}_1^p \mathbf{A}_1 \otimes \mathbf{A}_2^p \mathbf{A}_2) = \mathbf{A}_1^{p+1} \otimes \mathbf{A}_2^{p+1}$$

26 For  $p = 0$ , note that  $\mathbf{A}_1^0 = \mathbf{I}_m$  and  $\mathbf{A}_2^0 = \mathbf{I}_n$  where  $\mathbf{I}_n$  and  $\mathbf{I}_m$  are the  $(m \times m)$  and  $(n \times n)$  identity  
 27 matrices, respectively. Likewise,  $\mathbf{A}_\times^0 = \mathbf{I}_{mn}$ . From the definition of the Kronecker product, we have:

$$\mathbf{A}_1^0 \otimes \mathbf{A}_2^0 = \begin{bmatrix} 1 \mathbf{A}_2^0 & 0 \mathbf{A}_2^0 & \dots & 0 \mathbf{A}_2^0 \\ 0 \mathbf{A}_2^0 & 1 \mathbf{A}_2^0 & \dots & 0 \mathbf{A}_2^0 \\ \vdots & \vdots & \ddots & \vdots \\ 0 \mathbf{A}_2^0 & 0 \mathbf{A}_2^0 & \dots & 1 \mathbf{A}_2^0 \end{bmatrix} = \begin{bmatrix} \mathbf{I}_m & 0 & \dots & 0 \\ 0 & \mathbf{I}_m & \dots & 0 \\ \vdots & \vdots & \ddots & \vdots \\ 0 & 0 & \dots & \mathbf{I}_m \end{bmatrix} = \begin{bmatrix} 1 & 0 & \dots & 0 \\ 0 & 1 & \dots & 0 \\ \vdots & \vdots & \ddots & \vdots \\ 0 & 0 & \dots & 1 \end{bmatrix} = \mathbf{I}_{nm} = \mathbf{A}_\times^0$$

28

□

## 29 4 Real-World Graph Classification Datasets

30 We evaluated the proposed model on 10 publicly available graph classification datasets including 5  
 31 bio/chemo-informatics datasets: MUTAG, D&D, NCI1, PROTEINS and ENZYMES, as well as 5  
 32 social interaction datasets: IMDB-BINARY, IMDB-MULTI, REDDIT-BINARY, REDDIT-MULTI-  
 33 5K and COLLAB [5].

34 MUTAG consists of 188 mutagenic aromatic and heteroaromatic nitro compounds. The task is to  
 35 predict whether or not each chemical compound has mutagenic effect on the Gram-negative bacterium  
 36 *Salmonella typhimurium* [3]. ENZYMES contains 600 protein tertiary structures represented as graphs  
 37 obtained from the BRENDA enzyme database. Each enzyme is a member of one of the Enzyme  
 38 Commission top level enzyme classes (EC classes) and the task is to correctly assign the enzymes to  
 39 their classes [2]. NCI1 contains more than four thousand chemical compounds screened for activity  
 40 against non-small cell lung cancer and ovarian cancer cell lines [6]. PROTEINS contains proteins  
 41 represented as graphs where vertices are secondary structure elements and there is an edge between  
 42 two vertices if they are neighbors in the amino-acid sequence or in 3D space. The task is to classify  
 43 proteins into enzymes and non-enzymes [2]. D&D contains over a thousand protein structures. Each  
 44 protein is a graph whose nodes correspond to amino acids and a pair of amino acids are connected by  
 45 an edge if they are less than 6 Ångstroms apart. The task is to predict if a protein is an enzyme or not  
 46 [4]. IMDB-BINARY and IMDB-MULTI were created from IMDb, an online database of information  
 47 related to movies and television programs. The graphs contained in the two datasets correspond  
 48 to movie collaborations. The vertices of each graph represent actors/actresses and two vertices are  
 49 connected by an edge if the corresponding actors/actresses appear in the same movie. Each graph is  
 50 the ego-network of an actor/actress, and the task is to predict which genre an ego-network belongs to  
 51 [7]. REDDIT-BINARY and REDDIT-MULTI-5K contain graphs that model the social interactions  
 52 between users of Reddit. Each graph represents an online discussion thread. Specifically, each vertex  
 53 corresponds to a user, and two users are connected by an edge if one of them responded to at least  
 54 one of the other’s comments. The task is to classify graphs into either communities or subreddits [7].  
 55 COLLAB is a scientific collaboration dataset that consists of the ego-networks of several researchers  
 56 from three subfields of Physics (High Energy Physics, Condensed Matter Physics and Astro Physics).  
 57 The task is to determine the subfield of Physics to which the ego-network of each researcher belongs  
 58 [7].

59 A summary of the 10 datasets is given in Table 1 below.

| Dataset            | MUTAG | D&D    | NCI1  | PROTEINS | ENZYMES | IMDB<br>BINARY | IMDB<br>MULTI | REDDIT<br>BINARY | REDDIT<br>MULTI-5K | COLLAB   |
|--------------------|-------|--------|-------|----------|---------|----------------|---------------|------------------|--------------------|----------|
| Max # vertices     | 28    | 5,748  | 111   | 620      | 126     | 136            | 89            | 3,782            | 3,648              | 492      |
| Min # vertices     | 10    | 30     | 3     | 4        | 2       | 12             | 7             | 6                | 22                 | 32       |
| Average # vertices | 17.93 | 284.32 | 29.87 | 39.05    | 32.63   | 19.77          | 13.00         | 429.61           | 508.50             | 74.49    |
| Max # edges        | 33    | 14,267 | 119   | 1,049    | 149     | 1,249          | 1,467         | 4,071            | 4,783              | 40,119   |
| Min # edges        | 10    | 63     | 2     | 5        | 1       | 26             | 12            | 4                | 21                 | 60       |
| Average # edges    | 19.79 | 715.66 | 32.30 | 72.81    | 62.14   | 96.53          | 65.93         | 497.75           | 594.87             | 2,457.34 |
| # labels           | 7     | 82     | 37    | 3        | -       | -              | -             | -                | -                  | -        |
| # attributes       | -     | -      | -     | -        | 18      | -              | -             | -                | -                  | -        |
| # graphs           | 188   | 1,178  | 4,110 | 1,113    | 600     | 1,000          | 1,500         | 2,000            | 4,999              | 5,000    |
| # classes          | 2     | 2      | 2     | 2        | 6       | 2              | 3             | 2                | 5                  | 3        |

Table 1: Summary of the 10 datasets that were used in our experiments.

60 **5 Further Results**

61 In this Section, we visualize four “hidden graphs” for each of the 5 synthetic datasets described in the  
62 main paper: (1) Caveman dataset, (2) Cycle dataset, (3) Grid dataset, (4) Ladder dataset, and (5) Star  
63 dataset.

64 **5.1 Caveman dataset**

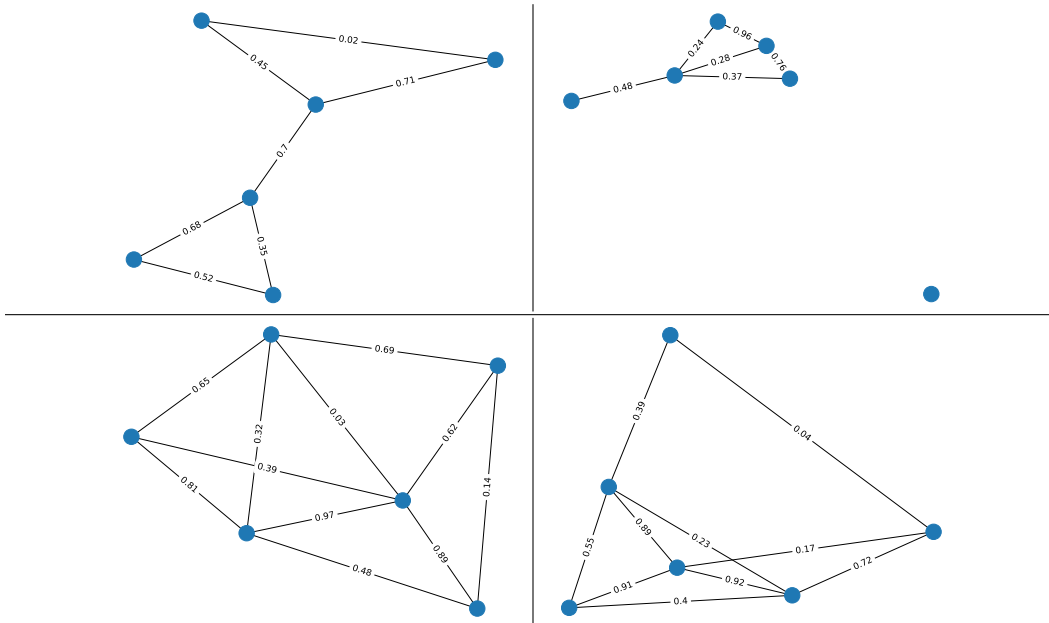

Figure 1: Examples of “hidden graphs” extracted from the proposed model for the Caveman dataset.

65 **5.2 Cycle dataset**

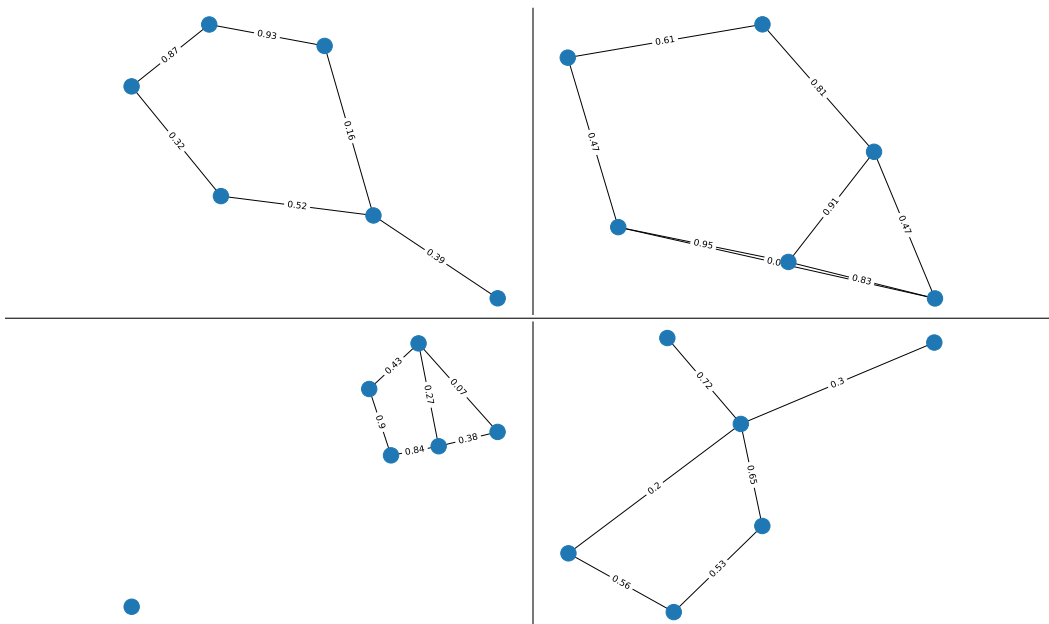

Figure 2: Examples of “hidden graphs” extracted from the proposed model for the Cycle dataset.

66 **5.3 Grid dataset**

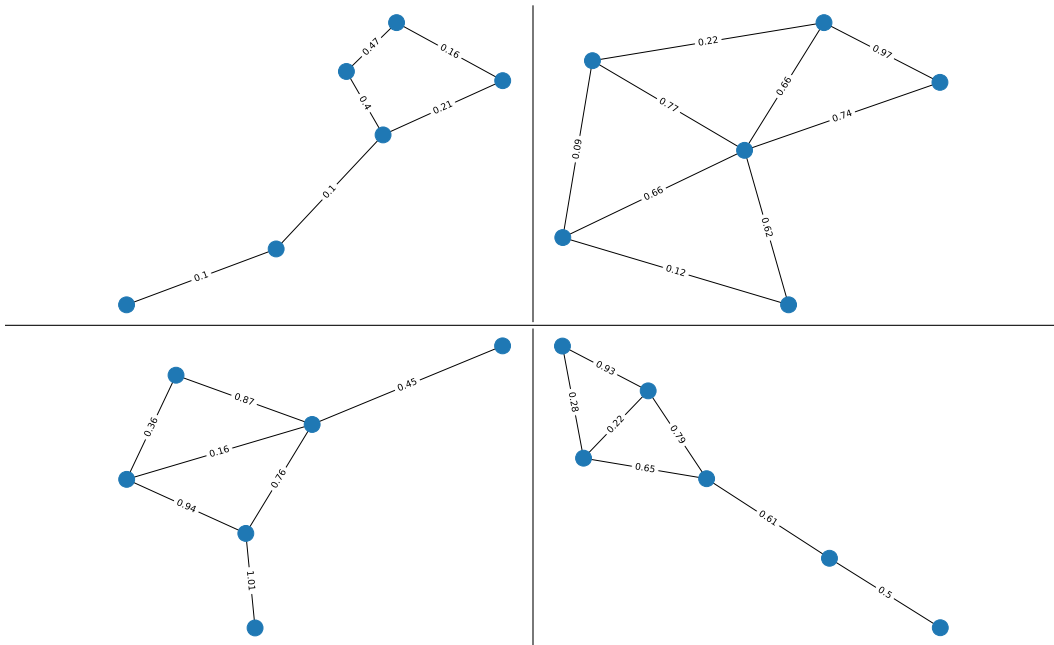

Figure 3: Examples of “hidden graphs” extracted from the proposed model for the Grid dataset.

67 **5.4 Ladder dataset**

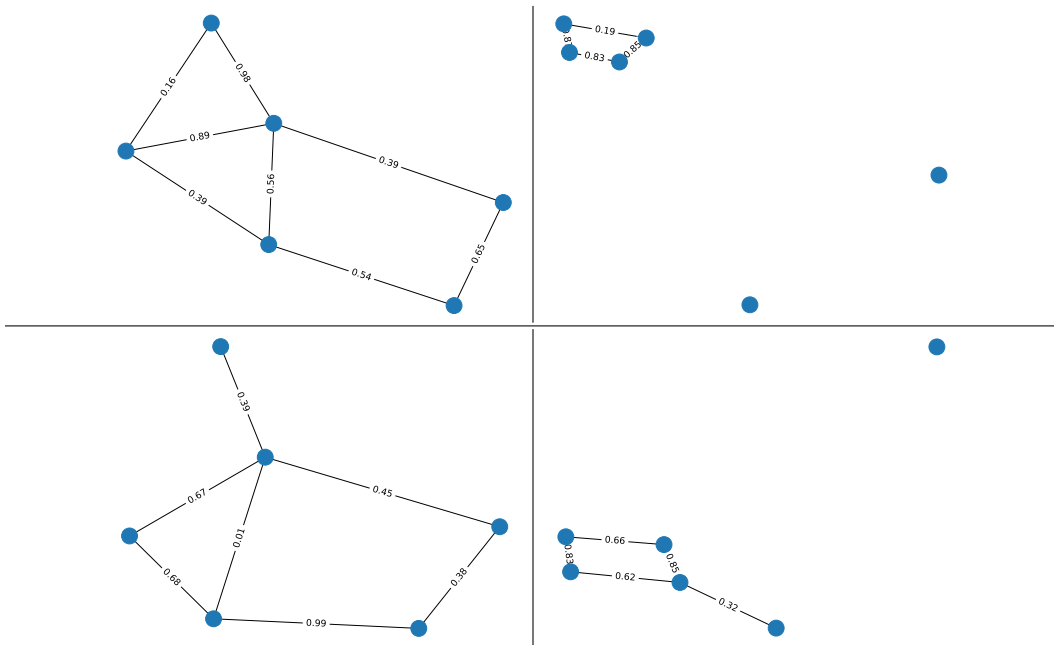

Figure 4: Examples of “hidden graphs” extracted from the proposed model for the Ladder dataset.

68 **5.5 Star dataset**

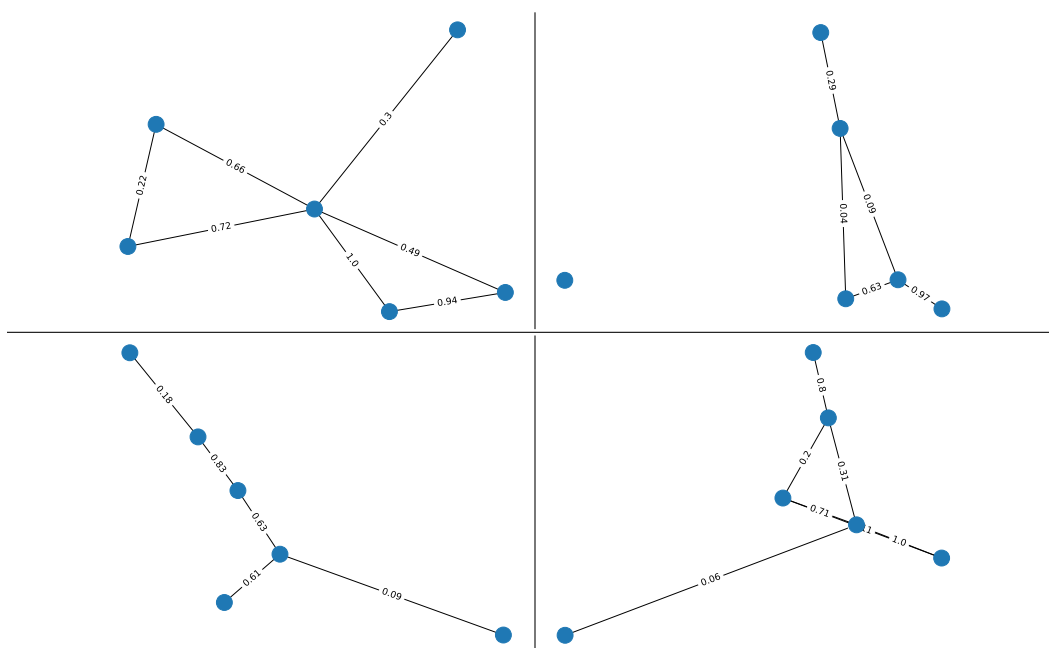

Figure 5: Examples of “hidden graphs” extracted from the proposed model for the Star dataset.

69 As mentioned in the main paper, it is interesting that the “hidden graphs” and their corresponding  
70 motifs share some similar properties.

71 **References**

- 72 [1] Dennis S Bernstein. *Matrix mathematics: theory, facts, and formulas*. Princeton University Press, 2009.
- 73 [2] K. Borgwardt, C. Ong, S. Schönauer, S. Vishwanathan, A. Smola, and H. Kriegel. Protein function prediction  
74 via graph kernels. *Bioinformatics*, 21(Suppl. 1):i47–i56, 2005.
- 75 [3] A. Debnath, R. Lopez de Compadre, G. Debnath, A. Shusterman, and C. Hansch. Structure-Activity  
76 Relationship of Mutagenic Aromatic and Heteroaromatic Nitro Compounds. Correlation with Molecular  
77 Orbital Energies and Hydrophobicity. *Journal of Medicinal Chemistry*, 34(2):786–797, 1991.
- 78 [4] P. Dobson and A. Doig. Distinguishing Enzyme Structures from Non-enzymes Without Alignments. *Journal*  
79 *of Molecular Biology*, 330(4):771–783, 2003.
- 80 [5] Kristian Kersting, Nils M. Kriege, Christopher Morris, Petra Mutzel, and Marion Neumann. Benchmark  
81 data sets for graph kernels, 2016. <http://graphkernels.cs.tu-dortmund.de>.
- 82 [6] N. Wale, I. Watson, and G. Karypis. Comparison of descriptor spaces for chemical compound retrieval and  
83 classification. *Knowledge and Information Systems*, 14(3):347–375, 2008.
- 84 [7] P. Yanardag and S. Vishwanathan. Deep Graph Kernels. In *Proceedings of the 21th ACM SIGKDD*  
85 *International Conference on Knowledge Discovery and Data Mining*, pages 1365–1374, 2015.
